# Supplementary material for: Improved electron extraction by a ZnO nanoparticle interlayer for solution-processed polymer solar cells
Source: Royal Society of Chemistry journal article supplement (doi:10.1039/c6ra28246f), 2017-01-01
Supplement: c6ra28246f1.pdf [file c6ra28246f1.pdf]

## Supplementary Information

### **Improved Electron Extraction by ZnO Nanoparticles Interlayer for Solution-Processed Polymer Solar Cells**

Xuning Zhang,<sup>a,b</sup> Shuo Yang,<sup>b</sup> Shiqing Bi,<sup>b</sup> Anbu Kumaresan,<sup>b</sup> Jiyu Zhou,<sup>c</sup> Jason Seifert,<sup>d</sup> Hongyu Mi,<sup>a</sup> Yun Xu,<sup>e</sup> Yuan Zhang,<sup>c,\*</sup> and Huiqiong Zhou<sup>b,\*</sup>

<sup>a</sup> *Xinjing Uygur Autonomous Region Key Laboratory of Coal Clean Conversion and Chemical Engineering Process, School of Chemistry and Chemical Engineering, Xinjiang University, Urumqi 830046, P. R. China*

<sup>b</sup> *CAS Key Laboratory of Nanosystem and Hierarchical Fabrication, CAS Center for Excellence in Nanoscience, National Center for Nanoscience and Technology, Beijing 100190, China.*

<sup>c</sup> *HEEGER Beijing Research & Development Center, School of Chemistry and Environment, Beihang University, Beijing 100191, P. R. China.*

<sup>d</sup> *Center for Polymers and Organic Solids, University of California Santa Barbara at Santa Barbara, California 93106, United States of America.*

<sup>e</sup> *Center for Medical Device Evaluation, China Food and Drug Administration, Beijing, 100044, China.*

\* Corresponding authors: Professor Yuan Zhang, E-mail: [yuanzhang@buaa.edu.cn](mailto:yuanzhang@buaa.edu.cn);

Professor Huiqiong Zhou, E-mail: [zhouhq@nanoctr.cn](mailto:zhouhq@nanoctr.cn).

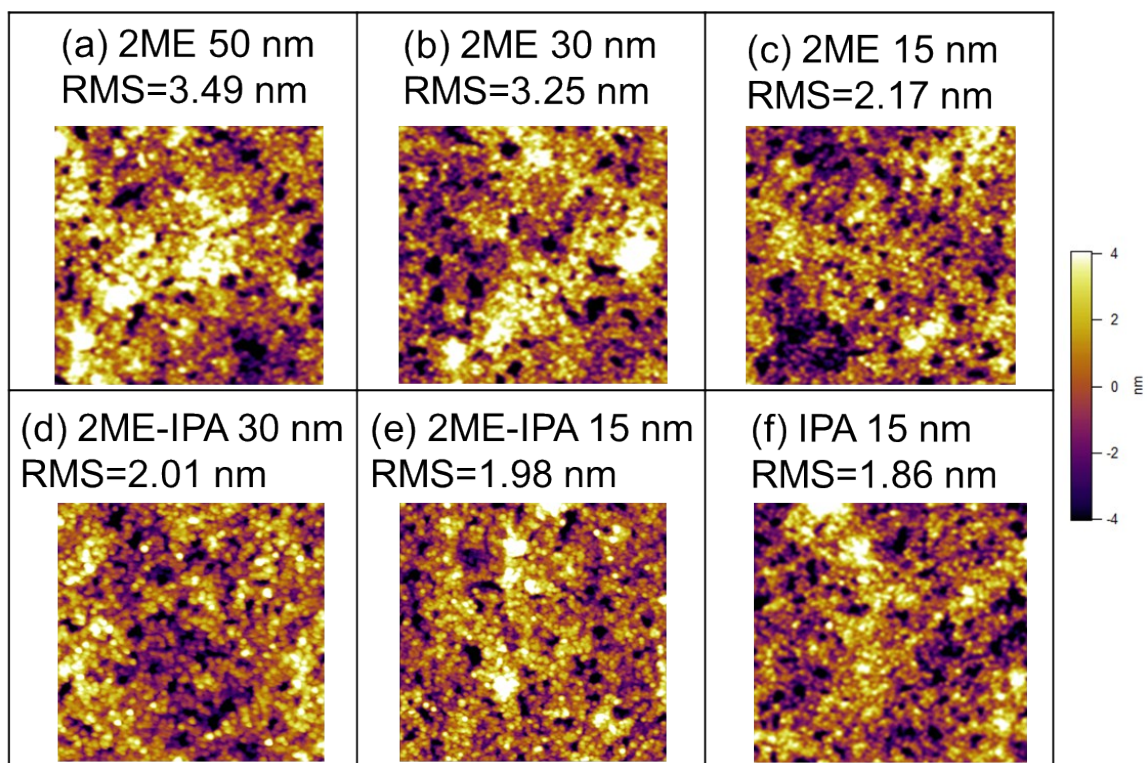

**Figure S1.** AFM surface topographic images of PTB7-Th:PC<sub>71</sub>BM active layer with ZnO nanoparticle thin films with different solvents and thicknesses. (image size: 2  $\mu\text{m}$   $\times$  2  $\mu\text{m}$ ).

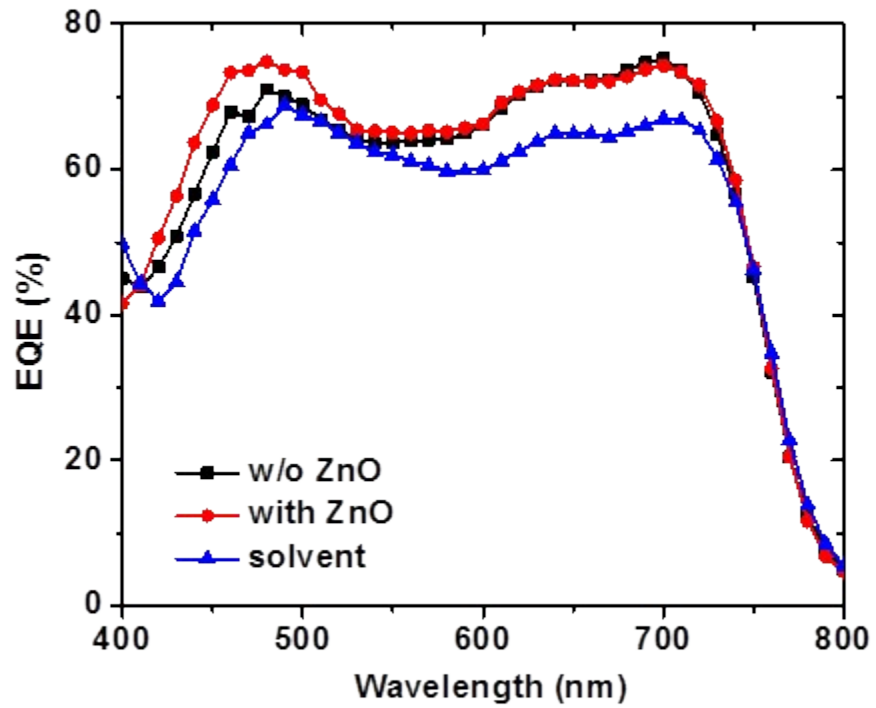

**Figure S2.** EQE spectra of PTB7-Th:PC<sub>71</sub>BM solar cells without, with ZnO nanoparticle ETLs, and treated only by the solvent of isopropanol.

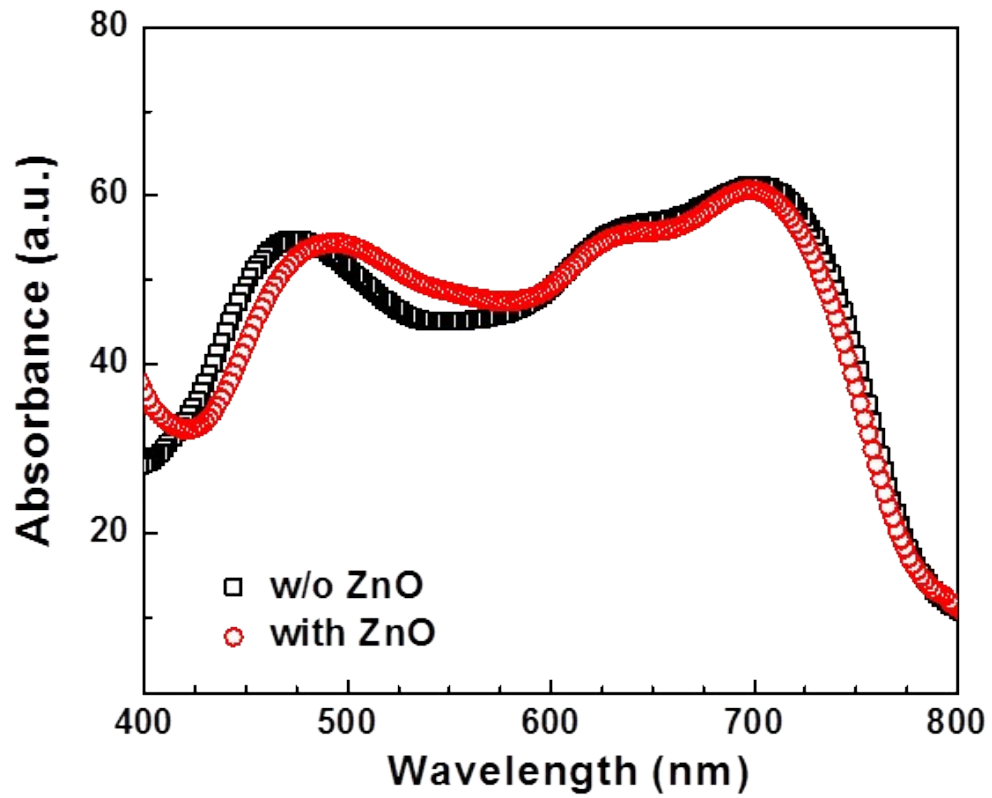

**Figure S3.** Absorption spectra of ITO/PEDOT:PSS/PTB7-Th:PC<sub>71</sub>BM/Al (reflection mode) with and without ZnO ETLs (30 nm).
